# Supplementary material
Source: Springer Nature journal article supplement (https://www.springermedizin.de/resource/supplementary/13561_2011_22_MOESM2_ESM.pdf/9687290)
Supplement: MOESM2 [file 9687290]

|                                                                                | Maternity<br>institution<br>A | Maternity<br>institution<br>B | Maternity<br>institution<br>C |
|--------------------------------------------------------------------------------|-------------------------------|-------------------------------|-------------------------------|
| Cost of a birth (JP¥)                                                          | 320,000                       | 400,000                       | 360,000                       |
| Traveling time (by car) to the facility (mins)                                 | 25                            | 5                             | 15                            |
| Waiting time for a medical exam (mins)                                         | 25                            | 15                            | 15                            |
| Medical exam in early-evening and weekend                                      | Yes                           | No                            | Yes                           |
| Number of obstetricians and gynecologists                                      | 7                             | 3                             | 1                             |
| Number of nursing staff                                                        | 8                             | 4                             | 2                             |
| Pediatricians on duty                                                          | 24 hours                      | Only in the daytime           | None                          |
| Please choose one most desirable facility and<br>✓ in <input type="checkbox"/> | <input type="checkbox"/>      | <input type="checkbox"/>      | <input type="checkbox"/>      |
